# Supplementary material for: Combined Experimental and Theoretical Investigation into the Photophysical Properties of Halogenated Coelenteramide Analogs
Source: MDPI journal article supplement (doi:10.3390/molecules27248875), 2022-12-14
Supplement: s1 [file s1]

*Supplementary Information for*

**Combined Experimental and Theoretical  
Investigation into the Photophysical Properties of  
Halogenated Coelenteramide Analogs**

## Table of Contents

|                                                                                                                                                       |    |
|-------------------------------------------------------------------------------------------------------------------------------------------------------|----|
| 1. General Synthetic Procedures .....                                                                                                                 | S3 |
| 1.1. <i>N</i> -(5-(4-Fluorophenyl)pyrazin-2-yl)acetamide ( <b>F-Clmd</b> ) .....                                                                      | S3 |
| 1.2. <i>N</i> -(5-(4-Chlorophenyl)pyrazin-2-yl)acetamide ( <b>Cl-Clmd</b> ) .....                                                                     | S4 |
| 2. Supporting Figures .....                                                                                                                           | S5 |
| Figure S1. <sup>1</sup> H-NMR, <sup>13</sup> C-NMR, and DEPT spectra of <i>N</i> -(5-(4-fluoro-phenyl)pyrazin-2-yl)acetamide ( <b>F-Clmd</b> ).....   | S5 |
| Figure S2. <sup>1</sup> H-NMR, <sup>13</sup> C-NMR, and DEPT spectra of <i>N</i> -(5-(4-chloro-phenyl)pyrazin-2-yl)acetamide ( <b>Cl-Clmd</b> ) ..... | S6 |
| Figure S3. FTMS-ESI (+) spectrum of <i>N</i> -(5-(4-fluorophenyl)pyrazin-2-yl)ace-<br>tamide ( <b>F-Clmd</b> ) .....                                  | S7 |
| Figure S4. FTMS-ESI (+) spectrum of <i>N</i> -(5-(4-chlorophenyl)pyrazin-2-yl)ace-<br>tamide ( <b>Cl-Clmd</b> ).....                                  | S7 |

## 1. General Synthetic Procedures

Reagents and solvents were purchased from Merck and used without further purification. All reactions involving oxygen or moisture-sensitive compounds were carried out under dry nitrogen atmosphere. Ice-water and silicon baths were used for reactions at low and high temperatures, respectively, with all reaction temperatures referring to the external bath. Organic extracts were dried over anhydrous Na<sub>2</sub>SO<sub>4</sub>, filtered and concentrated using a rotary evaporator (Büchi® Rotavapor® R-210, Büchi® B-491 Heating Bath 120V, KNF Neuberger D-79112 Vacuum Pump N 035.1.2 AN.18).

Reactions were monitored by thin-layer chromatography (TLC) using aluminum-backed Merck 60 F<sub>254</sub> silica gel plates and *n*-hexanes-ethyl acetate solvent systems. After visualization under ultraviolet light at 254 nm and 365 nm, the plates were developed by immersion in a solution containing a mixture of *p*-anisaldehyde (2.5%), acetic acid (1%), and sulfuric acid (3.4%) in 95% ethanol followed by heating. Solid compounds were mixed with SiO<sub>2</sub>, redissolved in DCM, and concentrated under reduced pressure before purification through column chromatography using silica gel (Aldrich, 230-400 mesh) and EtOAc-hexanes mixtures. Compounds were systematically named following IUPAC recommendations with ChemDraw v20.0.0.41 (Perkin-Elmer, Waltham, MA, USA).

NMR spectra were recorded in CDCl<sub>3</sub> or MeOH-d<sub>4</sub> solutions on a Bruker NMR spectrometer (Bruker Advance III 400 MHz Ascend, 9.4 Tesla), and chemical shifts are reported on the  $\delta$  scale (ppm) using the residual solvent signals [ $\delta$  = 7.26 ppm (<sup>1</sup>H, s, CDCl<sub>3</sub>);  $\delta$  = 77.0 ppm (<sup>13</sup>C, t, CDCl<sub>3</sub>)] or [ $\delta$  = 3.31 ppm (<sup>1</sup>H, qu, MeOH-d<sub>4</sub>), 4.78 ppm (<sup>1</sup>H, s, MeOH-d<sub>4</sub>);  $\delta$  = 49.2 ppm (<sup>13</sup>C, hep, MeOH-d<sub>4</sub>)] as internal standards. Coupling constants (*J*) are reported in Hz. FT-MS analysis were done on a LTQ Orbitrap™ XL hybrid mass spectrometer (Thermo Fischer Scientific, Bremen, Germany) controlled by LTQ Tune Plus and Xcalibur 2.1.0.

ESI = Electrospray ionization; EtOAc = Ethyl acetate; EtOH = Ethanol; hep = heptet; NBS = *N*-Bromosuccinimide; NMR = Nuclear magnetic resonance; FT-MS = Fourier transform mass spectrometry; qu = quintet; *rt* = Room temperature; s = singlet; t = triplet; THF = Tetrahydrofuran; TLC: Thin layer chromatography.

---

### 1.1. *N*-(5-(4-Fluorophenyl)pyrazin-2-yl)acetamide (F-Clmd)

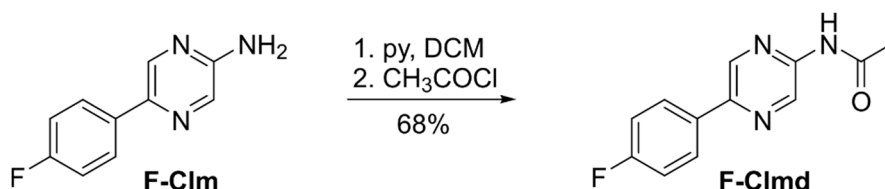

Pyridine (0.056 mL, 0.694 mmol, 1.75 eq) was added to a solution of 5-(4-fluorophenyl)pyrazin-2-amine (**F-Clm**) (0.075 g, 0.396 mmol, 1 eq) in DCM (5 mL), which was previously cooled to 0 °C, and stirred at that temperature for 5 min. Then acetyl chloride (0.085 mL, 1.189 mmol, 3 eq) was added and the mixture stirred at *rt* until no

starting material was detected by TLC (1:1 EtOAc-hexanes). The reaction mixture was washed with brine and extracted with DCM. The combined organic layers were dried with anhydrous sodium sulfate, filtered, and concentrated under reduced pressure to give a yellowish solid, which was purified by column chromatography (SiO<sub>2</sub>, hexanes-EtOAc gradient) to afford *N*-(5-(4-fluorophenyl)pyrazin-2-yl)acetamide (**F-Clmd**) as a white solid [0.063 g, 68%, *R<sub>f</sub>* = 0.39 (50% EtOAc/hex)].

**<sup>1</sup>H NMR** (400 MHz, Acetone)  $\delta$  = 9.76 (bs, 1H), 9.51 – 9.44 (d, *J*=1.6, 1H), 8.88 – 8.76 (d, *J*=1.6, 1H), 8.20 – 8.06 (m, 2H), 7.45 – 7.14 (m, 2H), 2.41 – 2.20 (s, 3H). **<sup>13</sup>C NMR** (101 MHz, Acetone)  $\delta$  = 170.0 (C=O), 166.8 – 162.9 (d, *J*=246.8, C-F), 148.7 (C), 147.2 (C), 139.9 (CH), 136.3 (CH), 133.9 (C), 129.3 (CH), 130.2 – 127.4 (d, *J*=8.4, 2xCH), 117.8 – 114.4 (d, *J*=21.8, 2xCH), 24.1 (CH<sub>3</sub>). **FTMS-ESI (+)**: *m/z*: calcd for [C<sub>12</sub>H<sub>11</sub>FN<sub>3</sub>O]<sup>+</sup>: 232.0886 [M+H]<sup>+</sup>; found 232.0885 [C<sub>12</sub>H<sub>11</sub>FN<sub>3</sub>O]<sup>+</sup>.

## 1.2. *N*-(5-(4-Chlorophenyl)pyrazin-2-yl)acetamide (**Cl-Clmd**)

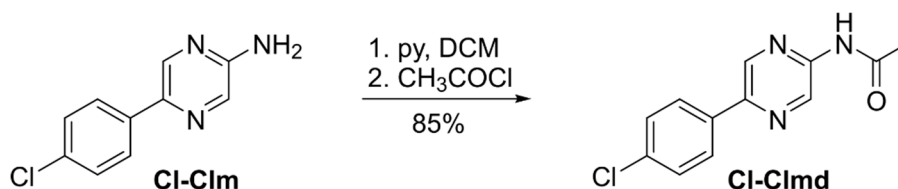

Pyridine (0.069 mL, 0.851 mmol, 1.75 eq) was added to a solution of 5-(4-chlorophenyl)pyrazin-2-amine (**Cl-Clm**) (0.100 g, 0.4863 mmol, 1 eq) in DCM (10 mL), which was previously cooled to 0 °C, and stirred at that temperature for 5 min. Then acetyl chloride (0.104 mL, 1.459 mmol, 3 eq) was added and the mixture stirred at *rt* until no starting material was detected by TLC (1:1 EtOAc-hexanes). The reaction mixture was washed with brine and extracted with DCM. The combined organic layers were dried with anhydrous sodium sulfate, filtered, and concentrated under reduced pressure to give a yellowish solid, which was purified by column chromatography (SiO<sub>2</sub>, hexanes-EtOAc gradient) to afford *N*-(5-(4-chlorophenyl)pyrazin-2-yl)acetamide (**Cl-Clmd**) as a white solid [0.102 g, 85%, *R<sub>f</sub>* = 0.30 (50% EtOAc/hex)].

**<sup>1</sup>H NMR** (400 MHz, Acetone)  $\delta$  = 9.78 (bs, 1H), 9.61 – 9.40 (d, *J*=1.5, 1H), 8.99 – 8.76 (d, *J*=1.5, 1H), 8.29 – 7.97 (m, 2H), 7.67 – 7.32 (m, 2H), 2.25 (s, 3H). **<sup>13</sup>C NMR** (101 MHz, Acetone)  $\delta$  = 170.0 (C=O), 149.1 (C), 146.9 (C), 140.2 (CH), 136.4 (CH), 135.6 (C), 130.0 (2xCH), 128.8 (2xCH), 24.2 (CH<sub>3</sub>). **FTMS-ESI (+)**: *m/z*: calcd for [C<sub>12</sub>H<sub>11</sub>ClN<sub>3</sub>O]<sup>+</sup>: 248.0591 [M+H]<sup>+</sup>; found 248.0591 [C<sub>12</sub>H<sub>11</sub><sup>35</sup>ClN<sub>3</sub>O]<sup>+</sup>, 250.0559 [C<sub>12</sub>H<sub>11</sub><sup>37</sup>ClN<sub>3</sub>O]<sup>+</sup>.

## 2. Supporting Figures

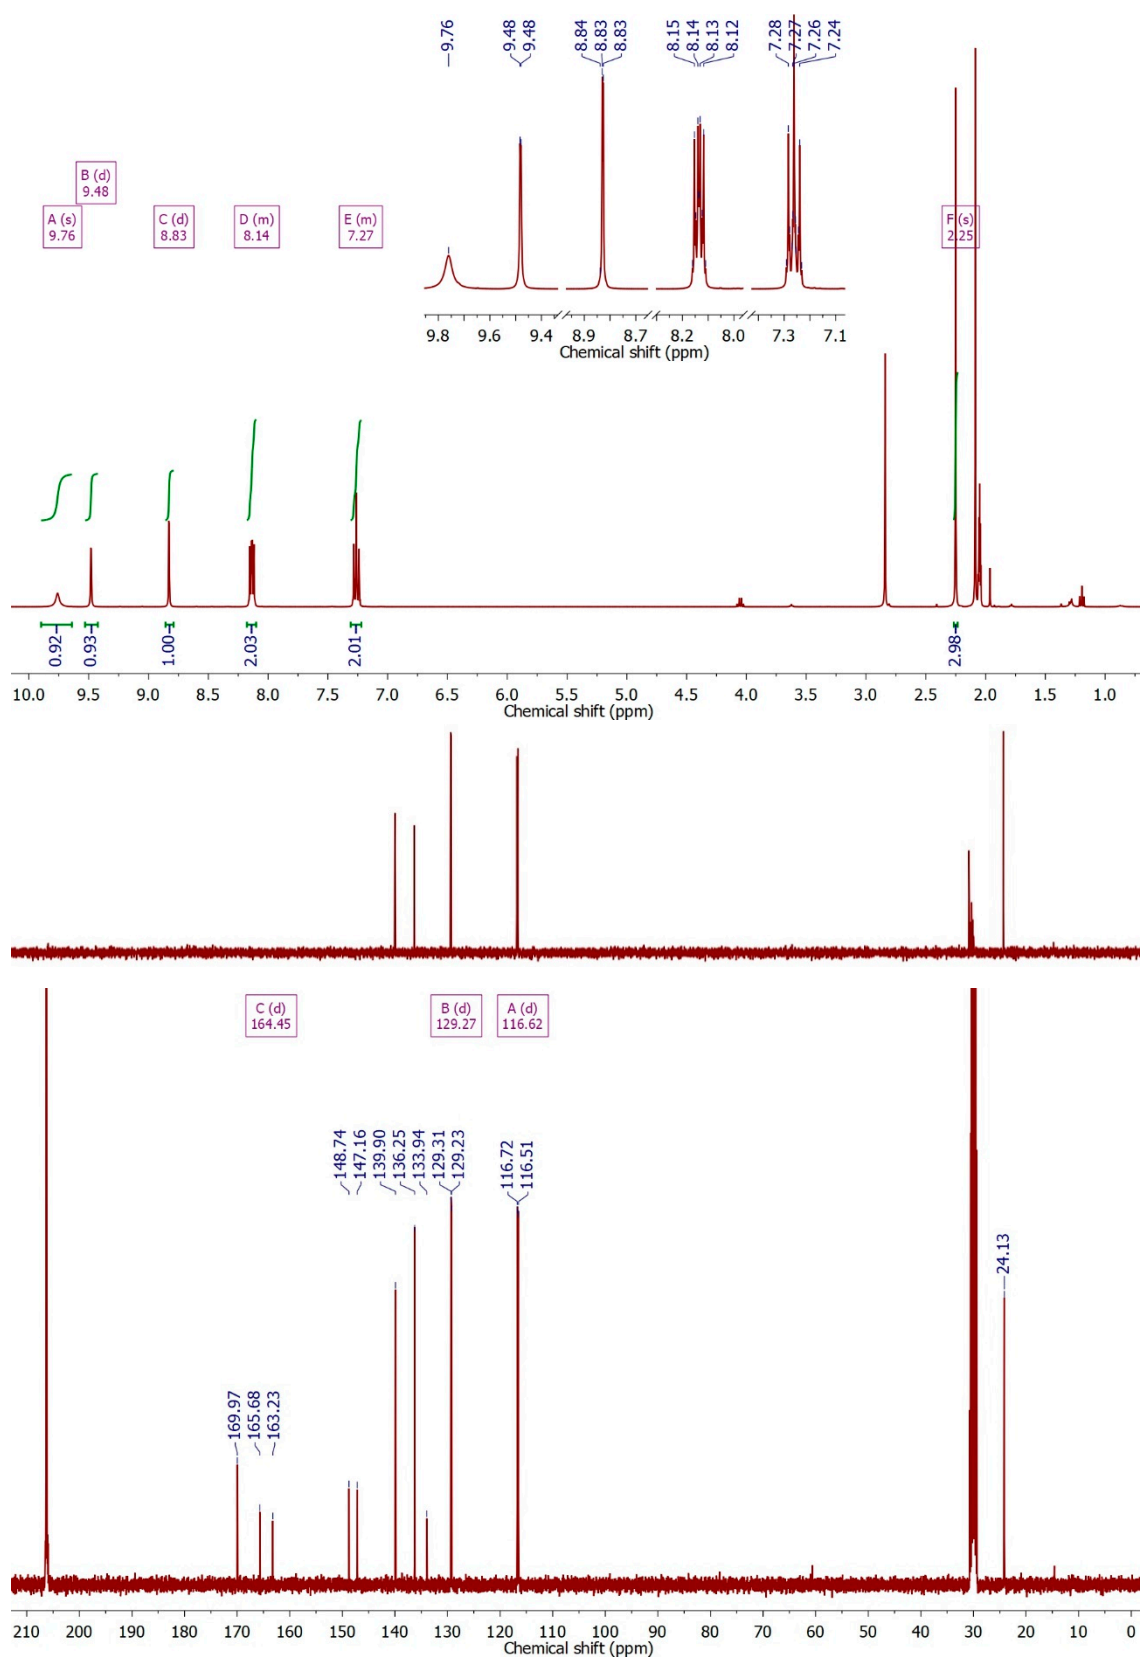

**Figure S1.** <sup>1</sup>H-NMR, <sup>13</sup>C-NMR, and DEPT spectra of *N*-(5-(4-fluorophenyl)pyrazin-2-yl)acetamide (**F-Clmd**): <sup>1</sup>H NMR (400 MHz, Acetone)  $\delta$  = 9.76 (bs, 1H), 9.51 – 9.44 (d,  $J$ =1.6, 1H), 8.88 – 8.76 (d,  $J$ =1.6, 1H), 8.20 – 8.06 (m, 2H), 7.45 – 7.14 (m, 2H), 2.41 – 2.20 (s, 3H); <sup>13</sup>C NMR (101 MHz, Acetone)  $\delta$  = 170.0 (C=O), 166.8 – 162.9 (d,  $J$ =246.8, C-F), 148.7 (C), 147.2 (C), 139.9 (CH), 136.3 (CH), 133.9 (C), 129.3 (CH), 130.2 – 127.4 (d,  $J$ =8.4, 2xCH), 117.8 – 114.4 (d,  $J$ =21.8, 2xCH), 24.1 (CH<sub>3</sub>).

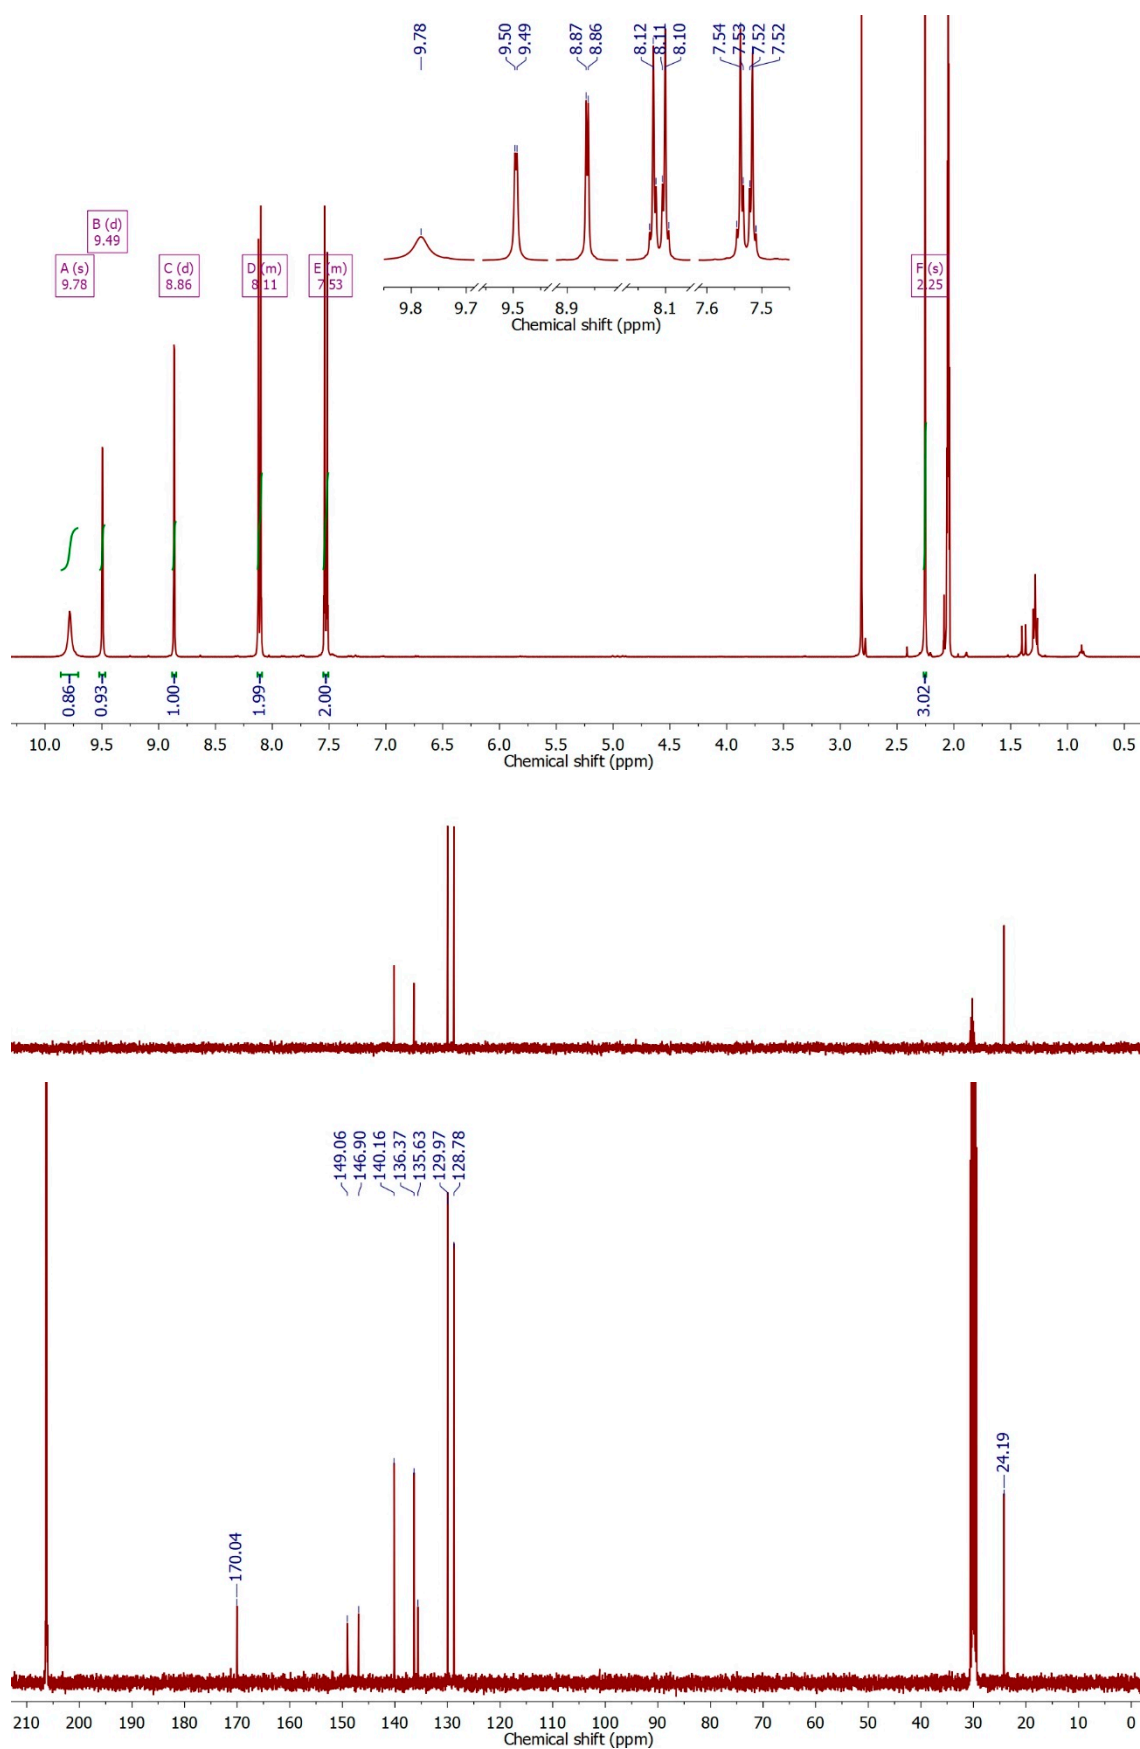

**Figure S2.** <sup>1</sup>H-NMR, <sup>13</sup>C-NMR, and DEPT spectra of *N*-(5-(4-chlorophenyl)pyrazin-2-yl)acetamide (**Cl-Clmd**): <sup>1</sup>H NMR (400 MHz, Acetone)  $\delta$  = 9.78 (bs, 1H), 9.61 – 9.40 (d,  $J$ =1.5, 1H), 8.99 – 8.76 (d,  $J$ =1.5, 1H), 8.29 – 7.97 (m, 2H), 7.67 – 7.32 (m, 2H), 2.25 (s, 3H); <sup>13</sup>C NMR (101 MHz, Acetone)  $\delta$  = 170.0 (C=O), 149.1 (C), 146.9 (C), 140.2 (CH), 136.4 (CH), 135.6 (C), 130.0 (2xCH), 128.8 (2xCH), 24.2 (CH<sub>3</sub>).

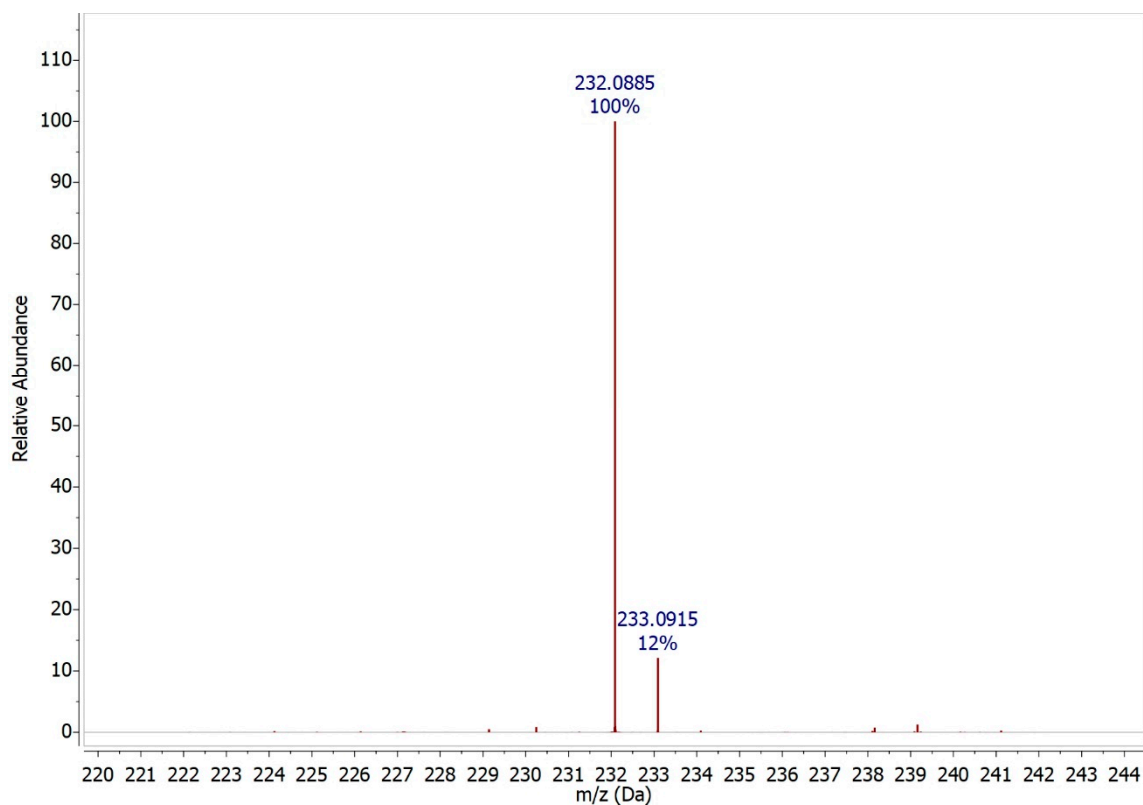

**Figure S3.** FTMS-ESI (+) spectrum of *N*-(5-(4-fluorophenyl)pyrazin-2-yl)acetamide (**F-Clmd**): m/z: calcd for  $[\text{C}_{12}\text{H}_{11}\text{FN}_3\text{O}]^+$ : 232.0886  $[\text{M}+\text{H}]^+$ ; found 232.0885  $[\text{C}_{12}\text{H}_{11}\text{FN}_3\text{O}]^+$ .

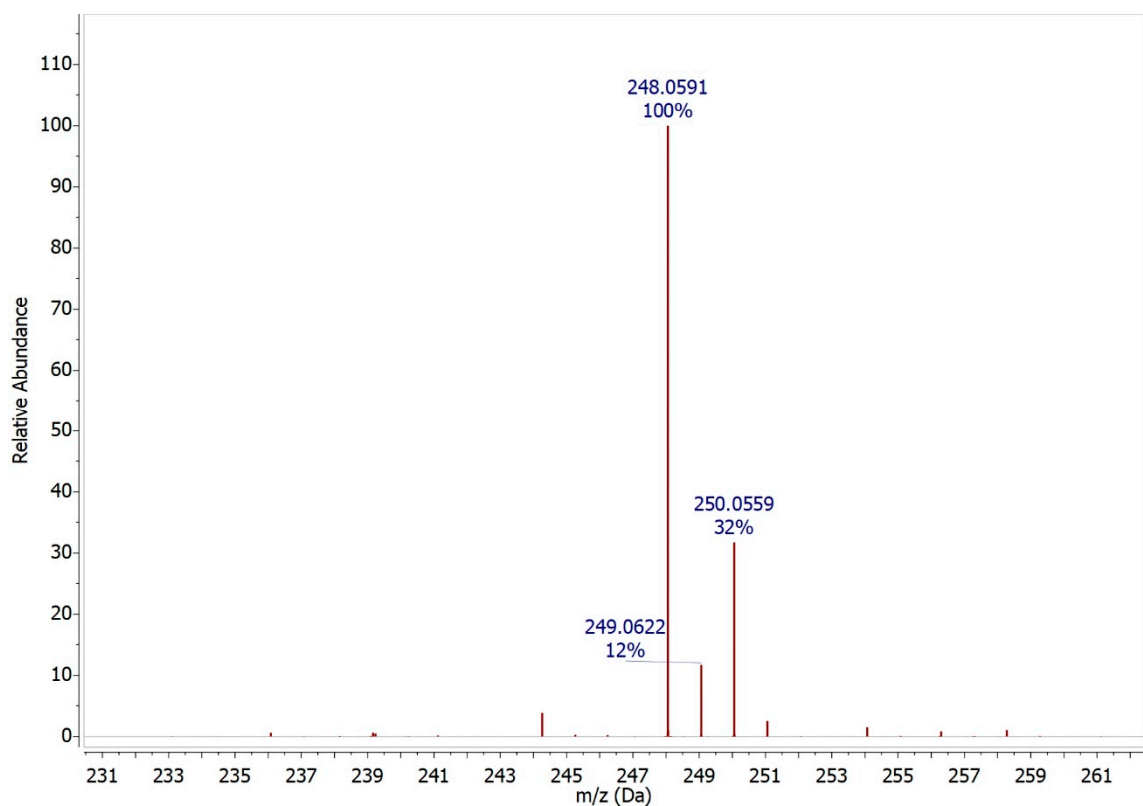

**Figure S4.** FTMS-ESI (+) spectrum of *N*-(5-(4-chlorophenyl)pyrazin-2-yl)acetamide (**Cl-Clmd**): m/z: calcd for  $[\text{C}_{12}\text{H}_{11}\text{ClN}_3\text{O}]^+$ : 248.0591  $[\text{M}+\text{H}]^+$ ; found 248.0591  $[\text{C}_{12}\text{H}_{11}^{35}\text{ClN}_3\text{O}]^+$ , 250.0559  $[\text{C}_{12}\text{H}_{11}^{37}\text{ClN}_3\text{O}]^+$ .
